# Supplementary material for: Reversible structural change of [Co2Fe2] complexes between diamagnetic hydrogen-bonded 1D chains and paramagnetic complexes within a layered structure of amphiphilic anions
Source: Royal Society of Chemistry journal article supplement (doi:10.1039/d4dt00482e), 2024-01-01
Supplement: d4dt00482e1.pdf [file d4dt00482e1.pdf]

**Supplementary Information for**

**Reversible structural change of [Co<sub>2</sub>Fe<sub>2</sub>] complexes between diamagnetic  
hydrogen-bonded 1D chains and paramagnetic complexes  
within a layered structure of amphiphilic anions**

Nozomi Mihara<sup>[a]</sup>, Soyoka Iitsuka<sup>[a]</sup>, Takuya Shiga<sup>[a]</sup>, and Masayuki Nihei\*<sup>[a]</sup>

[a] Department of Chemistry, Institute of Pure and Applied Sciences, University of Tsukuba, Tennodai1-1-1, Tsukuba, Ibaraki, 305-8571 (Japan).

## Table of contents

|            |                                                                                                        |     |
|------------|--------------------------------------------------------------------------------------------------------|-----|
| <b>S1</b>  | General methods .....                                                                                  | S3  |
| <b>S2</b>  | Materials .....                                                                                        | S4  |
| <b>S3</b>  | IR spectra of <b>1X<sub>2</sub></b> .....                                                              | S5  |
| <b>S4</b>  | Magnetic susceptibility of <b>1X<sub>2</sub></b> .....                                                 | S6  |
| <b>S5</b>  | TG-DTA and DSC of <b>1X<sub>2</sub></b> .....                                                          | S7  |
| <b>S6</b>  | Single crystal X-ray structural analysis of <b>1X<sub>2</sub></b> .....                                | S8  |
| <b>S7</b>  | PXRD of <b>1X<sub>2</sub></b> .....                                                                    | S14 |
| <b>S8</b>  | Single crystal X-ray structural analysis of <b>1T<sub>2</sub></b> .....                                | S15 |
| <b>S9</b>  | Magnetic susceptibility of <b>1T<sub>2</sub></b> .....                                                 | S18 |
| <b>S10</b> | IR spectra of <b>1T<sub>2</sub></b> and <b>1X<sub>2</sub></b> during heating and exposing to air ..... | S19 |
| <b>S11</b> | TG-DTA of <b>1T<sub>2</sub></b> .....                                                                  | S21 |
| <b>S12</b> | References.....                                                                                        | S22 |
| <b>S13</b> | Explanation of an alert in CIFCHECK.....                                                               | S23 |

## S1 General methods

Infrared absorption spectra were measured on KBr pellet samples or by ATR method using a SHIMADZU IRAffinity-1 spectrometer. A UNISOKU CoolSpeK UV/CD (USP-203A) was used for temperature control in the variable temperature IR spectrum measurements. Samples for KBr method were prepared by press of samples between KBr crystals (3 mm × 3 mm) for IR measurement.

Magnetic susceptibility data were collected using a Quantum Design MPMS-5XL SQUID magnetometer. 10–20 mg of sample wrapped in aluminium foil was used as the measurement sample. Temperature dependence was measured with an applied magnetic field of 1 T with the scan rate of 1 K/min in the temperature range of 5–400 K. Magnetic data were corrected for the diamagnetism of the sample holder and the diamagnetism of the sample using Pascal's constants. The magnitude of  $\chi_M T$  values of the holder for diamagnetic correction are  $10^{-3}$  emu K at 5–400 K. The values of the diamagnetic corrections of the samples are  $-1.65 \times 10^{-3}$  emu mol<sup>-1</sup> and  $-1.37 \times 10^{-3}$  emu mol<sup>-1</sup> for **1X**<sub>2</sub>-A and **1T**<sub>2</sub>, respectively.

Thermogravimetric measurements were performed using Shimadzu DTG-60 and DSC-60Plus in the temperature range of 200 K to 450 K for DSC measurements and in the temperature range of room temperature to 400 K for TG-DTA measurements. The samples for DSC were prepared by placing 1–2 mg of sample in an aluminium pan, crimped and covered with a lid. The samples for TG-DTA were prepared by placing 5–15 mg of sample in an aluminium pan.

Powder X-ray diffraction (PXRD) measurements were performed on a powder X-ray diffractometer (BRUKER, D8 ADVANCE) with a CCD two-dimensional detector using the Mo-K $\alpha$  line ( $\lambda = 1.5406 \text{ \AA}$ ) as X-ray source. The measurements were performed in  $2\theta$  range of 3.5–35°, every 0.01°, with an irradiation time of 1.5 s and tube voltage and current of 40 kV and 40 mA. The variable-temperature PXRD measurements were performed with TTK-450 (Anton Paar).

Elemental analysis was performed using a Perkin-Elmer Model 2400 organic elemental analyzer.

The detail of the X-ray structural analysis was described in Supplementary Section S6.

## S2 Materials

$\text{CoCl}_2 \cdot 6\text{H}_2\text{O}$  (wako 030-03685), 4,4'-di-*tert*-butyl-2,2'-bipyridyl (Sigma-Aldrich 515477), methanol (Wako 137-01823), *tert*-butyl alcohol (Wako 025-03396) and *N,N*-dimethylformamide (Wako 045-02916) were purchased and used without further purification.

### Preparation of $1\text{X}_2\text{-C}$ for elemental analysis

$1\text{X}_2\text{-A}$  was heated at 343 K and then cooled to room temperature. The resulting crystals were exposed to air to obtain  $1\text{X}_2\text{-C}$  as green crystals. Anal. calcd for  $\text{C}_{170}\text{H}_{268}\text{B}_2\text{Co}_2\text{Fe}_2\text{N}_{28}\text{O}_{22}\text{S}_2$  ( $1\text{X}_2 \cdot 6\text{H}_2\text{O}$ ): C, 60.31; H, 8.01; N, 11.64; found: C, 60.39; H, 7.96; N, 11.62; (0.08% error).

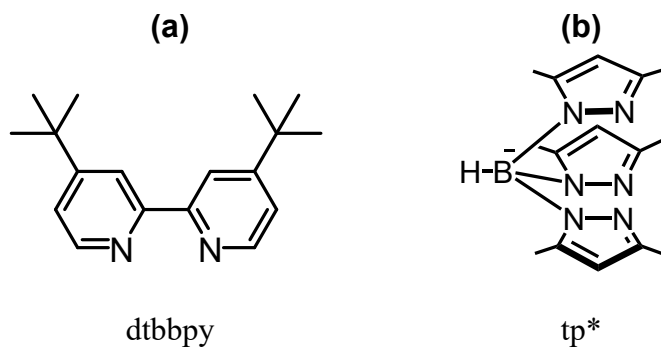

**Figure S1** The schemes of (a) dtbbpy (4,4'-di-*tert*-butyl-2,2'-bipyridyl) and (b) tp\* (hydrotris(3,5-dimethylpyrazol-1-yl)borate).

### S3 IR spectra of $1X_2$

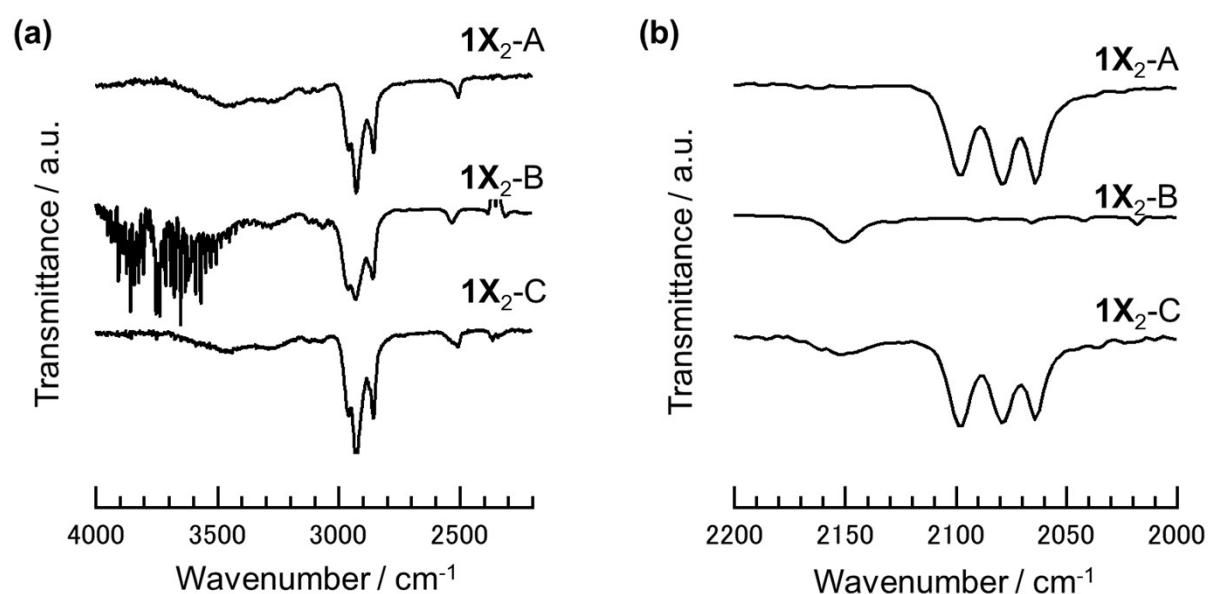

**Figure S2** IR spectrum of  $1X_2$ -A– $1X_2$ -C ((a) 4000–2200  $\text{cm}^{-1}$ , (b) 2200–2000  $\text{cm}^{-1}$ ). The noisy spectrum (4000–3500  $\text{cm}^{-1}$ ) of  $1X_2$ -B, formed by heating  $1X_2$ -A in IR machine, is presumably because of the temperature difference of the measurement of background (r.t.) and  $1X_2$ -B (373 K).

**Table S1** Stretching vibration values of bridging and terminal CN groups of  $1(\text{PF}_6)_2 \cdot 2\text{MeOH}^{[1]}$  and  $1X_2$ .

|                                                         | Bridging CN groups ( $\text{cm}^{-1}$ )           |                                                   | Terminal CN groups ( $\text{cm}^{-1}$ ) |                                   |
|---------------------------------------------------------|---------------------------------------------------|---------------------------------------------------|-----------------------------------------|-----------------------------------|
|                                                         | $\text{Fe}^{\text{III}}\text{-CN-Co}^{\text{II}}$ | $\text{Fe}^{\text{II}}\text{-CN-Co}^{\text{III}}$ | $\text{Fe}^{\text{III}}\text{-CN}$      | $\text{Fe}^{\text{II}}\text{-CN}$ |
| $1(\text{PF}_6)_2 \cdot 2\text{MeOH}$<br>(335 K) / (HS) | 2152                                              | -                                                 | 2127                                    | -                                 |
| $1(\text{PF}_6)_2 \cdot 2\text{MeOH}$<br>(220 K) / (LS) | -                                                 | 2098, 2077                                        | -                                       | 2070                              |
| $1X_2$ -A                                               | -                                                 | 2097, 2079                                        | -                                       | 2064                              |
| $1X_2$ -B                                               | 2150                                              | -                                                 | 2129                                    | -                                 |
| $1X_2$ -C                                               | 2149                                              | 2097, 2077                                        | -                                       | 2064                              |

#### S4 Magnetic susceptibility of $1X_2$

The first and the fourth heating/cooling cycles of magnetic susceptibility measurements of  $1X_2$ -A are shown in Figure S3(a) and (b), respectively. The heating process of Figure S3(a) is same as the data in Figure 4(c). The  $\chi_M T$  value is 0.31 emu mol<sup>-1</sup> K at 5 K, which is slightly larger than the expected value ( $\chi_M T = 0$  emu mol<sup>-1</sup> K) for the LS state of  $1^{2+}$  consisting of two *ls*-Fe<sup>II</sup> ions ( $S = 0$ ) and two *ls*-Co<sup>III</sup> ions ( $S = 0$ ), suggesting that the complex is in the LS state but contains a small amount of paramagnetic impurities. The  $\chi_M T$  value increases rapidly when the temperature increases from 300 K to 320 K. This rapid increase in  $\chi_M T$  value is attributed to the thermally induced ETCST from the LS to the HS state. The  $\chi_M T$  value was 6.15 emu mol<sup>-1</sup> K at 400 K. The expected value for the HS state of  $1^{2+}$  consisting of two *ls*-Fe<sup>III</sup> ions ( $S = 1/2$ ,  $g = 2.7$ ) and two *hs*-Co<sup>II</sup> ions ( $S = 3/2$ ,  $g = 2.3$ ) without magnetic interaction<sup>[2]</sup> is  $\chi_M T = 6.33$  emu mol<sup>-1</sup> K, which indicates that all of  $1^{2+}$  is in HS state at 400 K. Therefore, the complex was in the LS state at room temperature and completely changed to the HS state.

During the cooling process from 240 K to 100 K, the  $\chi_M T$  value shows a gradual decrease to 4.77 emu mol<sup>-1</sup> K at 100 K, suggesting that about 25% of  $1^{2+}$  changed to the LS state. When the cycle of heating and cooling in the range of 5–400 K was repeated four times, the plot resulted in a gradual transition in the range of 130–240 K.

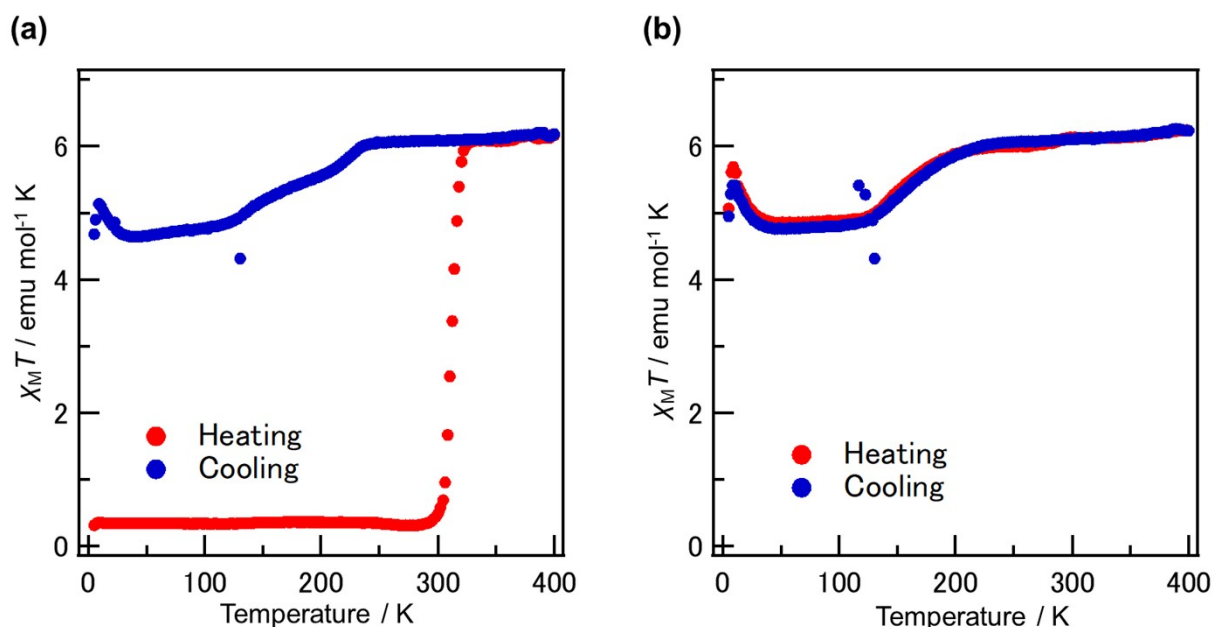

**Figure S3**  $\chi_M T$ - $T$  plot of  $1X_2$ -A of (a) The first cycle and (b) The fourth cycle.

## S5 TG-DTA and DSC of $1X_2$

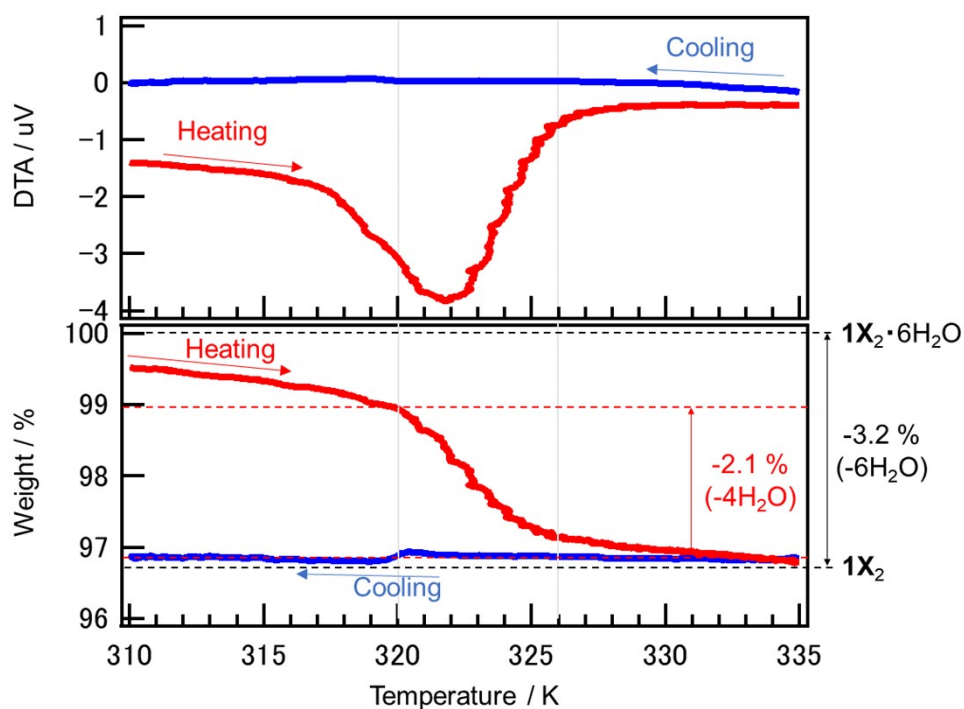

**Figure S4** TG-DTA of  $1X_2$ -A (Scan rate : 1 K  $\text{min}^{-1}$ ).

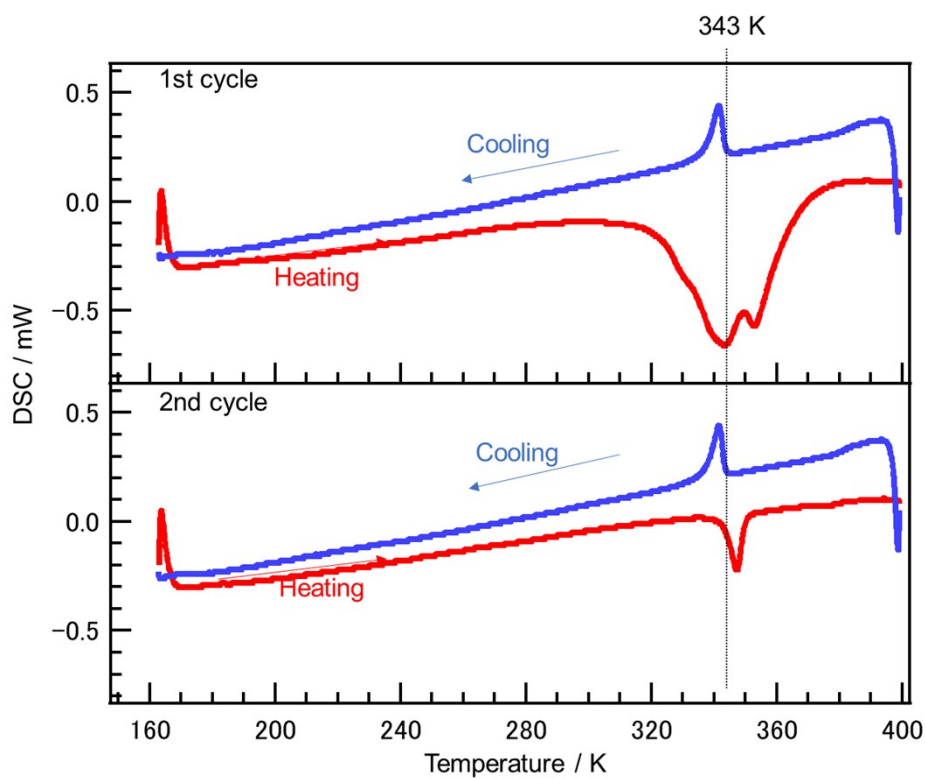

**Figure S5** DSC of  $1X_2$ -A (Scan rate : 10 K  $\text{min}^{-1}$ ).

## S6 Single crystal X-ray structural analysis of 1X<sub>2</sub>

Single crystals were mounted with Paratone-N on MicroLoops or glue on glass capillary. Diffraction data were collected using a Bruker SMART APEX II ULTRA diffractometer equipped with a CCD type area detector. The data was collected with graphite-monochromated Mo-K $\alpha$  radiation ( $\lambda = 0.71073 \text{ \AA}$ ). The data frames were integrated using the SAINT program and merged to give a unique data set for structure determination. An absorption correction was performed using SADABS. The structure was solved by direct methods and refined on  $F^2$  by the full-matrix least-squares methods using SHELXTL package (Bruker Analytical X-ray systems). Non-hydrogen atoms were refined with anisotropic thermal parameters. Hydrogen atoms were included in calculated positions and refined with isotropic thermal parameters riding on those of the parent atoms. CCDC 2333265–2333267 contain the supplementary crystallographic data for this paper. These data can be obtained free of charge via [www.ccdc.cam.ac.uk/conser/trieving.html](http://www.ccdc.cam.ac.uk/conser/trieving.html) (or from the Cambridge Crystallographic Data Centre, 12, Union Road, Cambridge CB21EZ, UK; fax: (+44)1223-336-033; or [deposit@ccdc.cam.ac.uk](mailto:deposit@ccdc.cam.ac.uk)). Crystallographic parameters are summarized in Table S5 and S8.



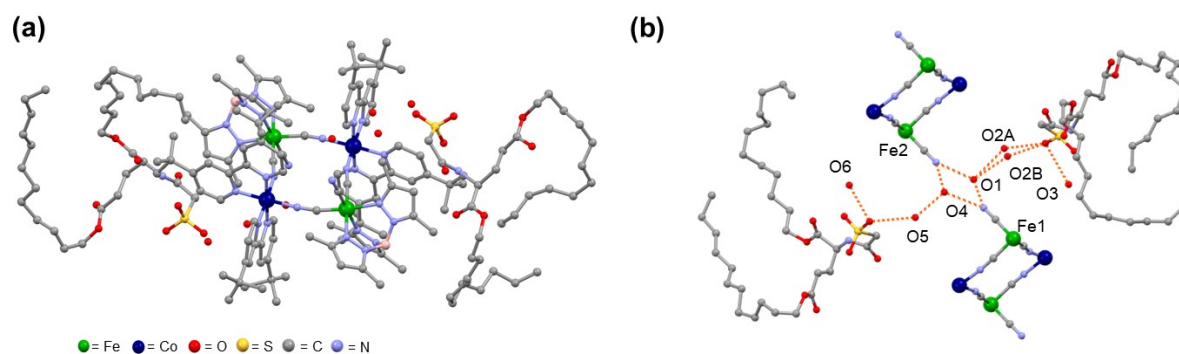

**Figure S6** (a) Single crystal X-ray structure of  $1\mathbf{X}_2\text{-A}$  at 200 K. Hydrogen atoms are omitted for clarity. (b) The hydrogen-bonding network of  $1\mathbf{X}_2\text{-A}$  and water molecules. Hydrogen atoms and ligands are omitted for clarity.

**Table S2** The distances ( $\text{\AA}$ ) of the coordination bonds of  $1\mathbf{X}_2 \cdot 6\text{H}_2\text{O}$  ( $1\mathbf{X}_2\text{-A}$ ) obtained by X-ray structural analysis.

|                 |           |                 |           |
|-----------------|-----------|-----------------|-----------|
|                 | 1.942(10) |                 | 1.935(10) |
| Co(1)-N(dtbbpy) | 1.921(10) | Co(2)-N(dtbbpy) | 1.941(10) |
|                 | 1.933(11) |                 | 1.939(10) |
|                 | 1.931(9)  |                 | 1.903(10) |
|                 | 1.885(10) |                 | 1.919(10) |
| Co(1)-N(NC)     | 1.931(13) | Co(2)-N(NC)     | 1.884(10) |
|                 | 1.924(11) |                 | 1.920(10) |
| Co(1)-N(ave)    | 2.046(11) | Co(2)-N(ave)    | 2.083(10) |
|                 | 2.042(10) |                 | 2.044(11) |
|                 | 2.040(10) |                 | 2.016(11) |
| Fe(1)-N(tp*)    | 1.874(12) | Fe(2)-N(tp*)    | 1.916(13) |
|                 | 1.854(14) |                 | 1.868(13) |
|                 | 1.857(14) |                 | 1.919(12) |
| Fe(1)-C(CN)     | 2.043     | Fe(2)-C(CN)     | 2.048(11) |
|                 | 1.862(13) |                 | 1.901(13) |
| Fe(1)-N(ave)    |           | Fe(2)-N(ave)    |           |
| Fe(1)-C(ave)    |           | Fe(2)-C(ave)    |           |

**Table S3** The distances ( $\text{\AA}$ ) of the hydrogen-bonds of  $1\mathbf{X}_2 \cdot 6\text{H}_2\text{O}$  ( $1\mathbf{X}_2\text{-A}$ ) obtained by X-ray structural analysis.

|                           |       |                          |       |
|---------------------------|-------|--------------------------|-------|
| O(1)-N(NC)                | 2.809 | O(4)-N(NC)               | 3.030 |
|                           | 3.019 |                          | 2.749 |
| O(1)-O(2A)                | 2.857 | O(4)-O(5)                | 2.579 |
| O(1)-O(2B)                | 2.888 | O(5)-O(SO <sub>3</sub> ) | 3.015 |
| O(2A)-O(SO <sub>3</sub> ) | 2.892 | O(6)-O(SO <sub>3</sub> ) | 2.985 |
| O(2B)-O(SO <sub>3</sub> ) | 2.640 | O(3)-O(SO <sub>3</sub> ) | 3.393 |

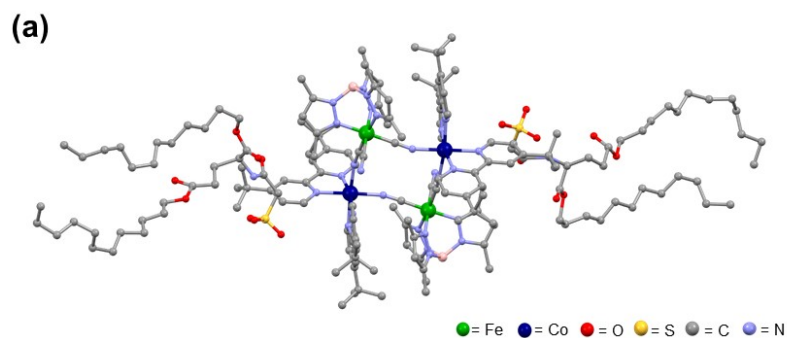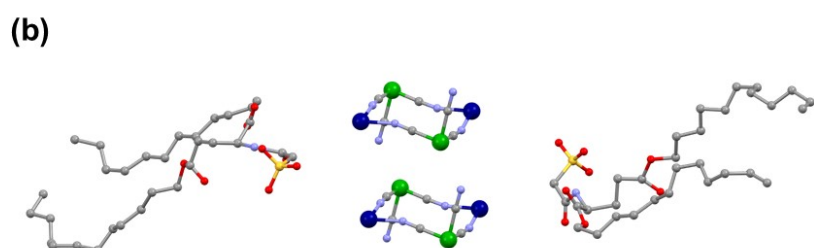

**Figure S7** (a) Single crystal X-ray structure of  $1X_2$ -B at 200 K. Hydrogen atoms are omitted for clarity. (b) The arrangement of  $1^{2+}$  and  $X^-$  in  $1X_2$ -B. Hydrogen atoms and ligands are omitted for clarity.

**Table S4** The distances ( $\text{\AA}$ ) of the coordination bonds of  $1X_2$  ( $1X_2$ -B) obtained by X-ray structural analysis.

|                     |         |                     |           |
|---------------------|---------|---------------------|-----------|
|                     | 2.11(2) |                     | 2.171(15) |
| Co(1)-N(dtbbpy)     | 2.12(3) | Co(2)-N(dtbbpy)     | 2.132(17) |
|                     | 2.10(3) |                     | 2.11(3)   |
|                     | 2.18(3) |                     | 2.09(3)   |
|                     | 2.08(3) |                     | 2.07(3)   |
| Co(1)-N(NC)         | 2.14(4) | Co(2)-N(NC)         | 2.09(3)   |
|                     |         |                     |           |
| <b>Co(1)-N(ave)</b> | 2.12(4) | <b>Co(2)-N(ave)</b> | 2.11(3)   |
| Fe(1)-N(tp*)        | 1.98(3) | Fe(2)-N(tp*)        | 1.99(3)   |
|                     | 2.01(2) |                     | 2.05(2)   |
|                     | 2.00(2) |                     | 1.94(2)   |
| Fe(1)-C(CN)         | 1.87(3) | Fe(2)-C(CN)         | 1.80(5)   |
|                     | 1.91(4) |                     | 1.97(3)   |
|                     | 1.90(3) |                     | 1.96(4)   |
| <b>Fe(1)-N(ave)</b> | 1.97(3) | <b>Fe(2)-N(ave)</b> | 1.99(3)   |
| <b>Fe(1)-C(ave)</b> | 1.89(4) | <b>Fe(2)-C(ave)</b> | 1.91(4)   |

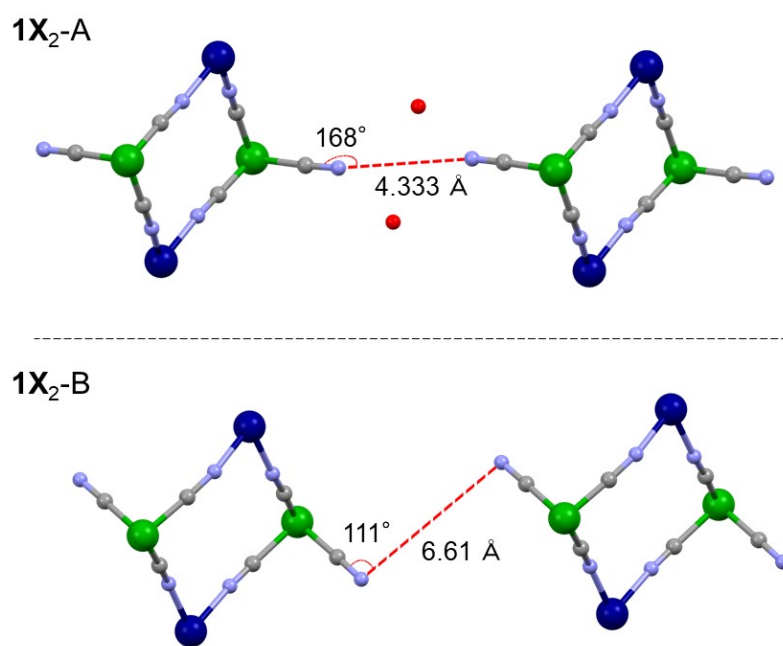

**Figure S8** The comparison of the distances between terminal CN groups of neighbouring  $1^{2+}$  molecules in the crystal structure of  $1X_2$ -A and  $1X_2$ -B.

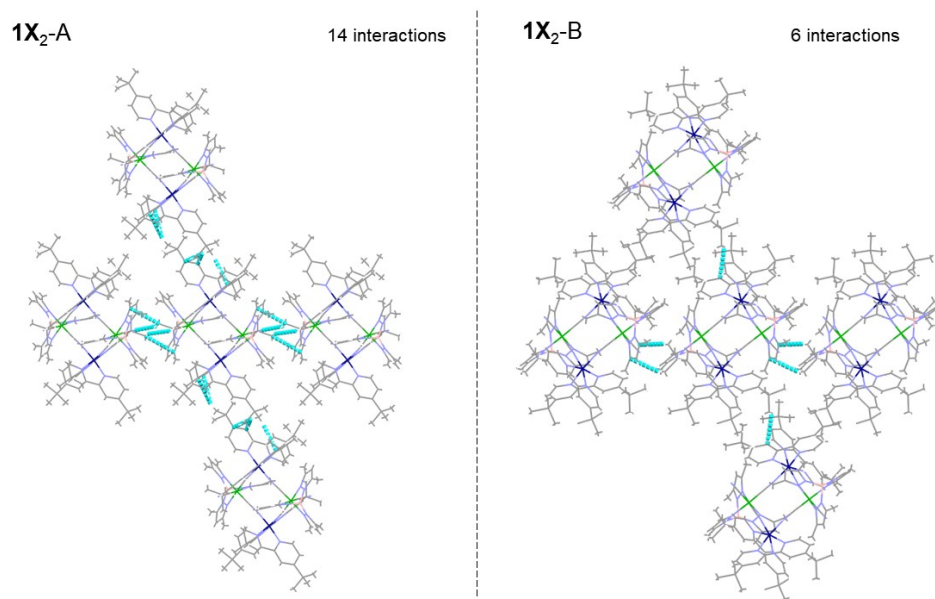

**Figure S9** The comparison of the numbers of CH- $\pi$  interactions (light blue lines) between a molecule of  $1^{2+}$  and neighbouring four molecules of  $1^{2+}$  in  $1X_2$ -A and  $1X_2$ -B.

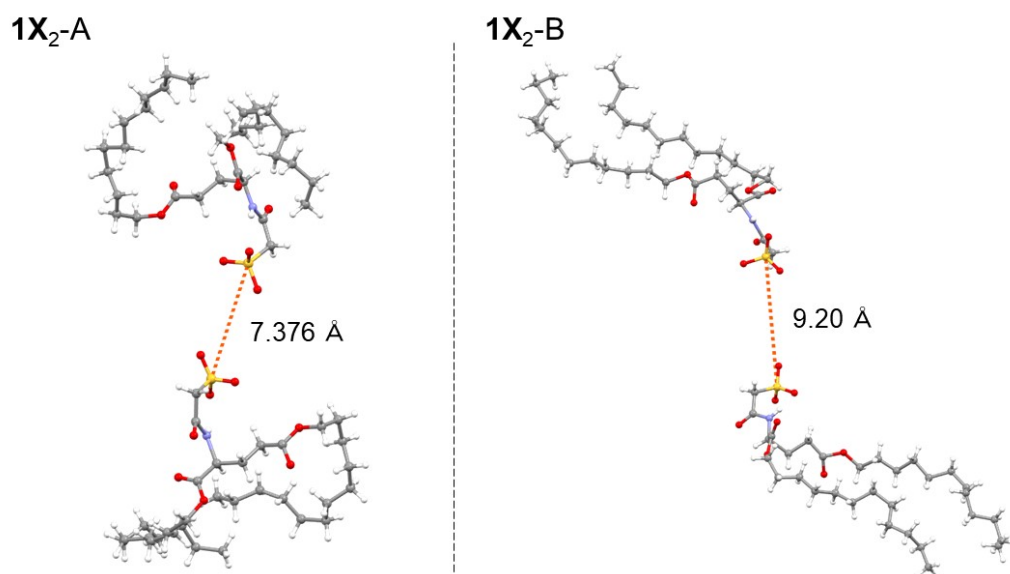

**Figure S10** The comparison of the distances between S atoms and the structure of alkyl chains of X<sup>-</sup> of in 1X<sub>2</sub>-A and 1X<sub>2</sub>-B.

**Table S5** Crystallographic parameters and measurement conditions of **1X<sub>2</sub> · 6H<sub>2</sub>O (1X<sub>2</sub>-A)** and **1X<sub>2</sub> (1X<sub>2</sub>-B)**.

|                                                     | <b>1X<sub>2</sub>-A</b>                                                                                                         | <b>1X<sub>2</sub>-B</b>                                                                                                         |
|-----------------------------------------------------|---------------------------------------------------------------------------------------------------------------------------------|---------------------------------------------------------------------------------------------------------------------------------|
| Empirical formula                                   | C <sub>170</sub> H <sub>256</sub> B <sub>2</sub> Co <sub>2</sub> Fe <sub>2</sub> N <sub>28</sub> O <sub>22</sub> S <sub>2</sub> | C <sub>170</sub> H <sub>250</sub> B <sub>2</sub> Co <sub>2</sub> Fe <sub>2</sub> N <sub>28</sub> O <sub>16</sub> S <sub>2</sub> |
| Formula weight                                      | 3359.31                                                                                                                         | 3257.27                                                                                                                         |
| Temperature / K                                     | 200(2)                                                                                                                          | 200(2)                                                                                                                          |
| Wavelength / Å                                      | 0.71073                                                                                                                         | 0.71073                                                                                                                         |
| Crystal system                                      | Triclinic                                                                                                                       | Triclinic                                                                                                                       |
| Space group                                         | <i>P</i> 1                                                                                                                      | <i>P</i> 1                                                                                                                      |
| <i>a</i> / Å                                        | 12.8879(8)                                                                                                                      | 13.052(12)                                                                                                                      |
| <i>b</i> / Å                                        | 17.7778(12)                                                                                                                     | 16.203(15)                                                                                                                      |
| <i>c</i> / Å                                        | 22.5479(15)                                                                                                                     | 23.83(2)                                                                                                                        |
| $\alpha$ / °                                        | 75.892(1)                                                                                                                       | 77.546(9)                                                                                                                       |
| $\beta$ / °                                         | 79.585(1)                                                                                                                       | 78.183(8)                                                                                                                       |
| $\gamma$ / °                                        | 71.793(1)                                                                                                                       | 72.120(8)                                                                                                                       |
| <i>V</i> / Å <sup>3</sup>                           | 4728.7(5)                                                                                                                       | 4631(2)                                                                                                                         |
| <i>Z</i>                                            | 1                                                                                                                               | 1                                                                                                                               |
| Density (calculated) / Mg m <sup>-3</sup>           | 1.180                                                                                                                           | 1.170                                                                                                                           |
| Absorption coefficient / mm <sup>-1</sup>           | 0.411                                                                                                                           | 0.416                                                                                                                           |
| <i>F</i> (000)                                      | 1796                                                                                                                            | 1742                                                                                                                            |
| Theta range for data collection                     | 1.390 to 27.500                                                                                                                 | 0.885 to 27.491                                                                                                                 |
| Reflections collected                               | 56005                                                                                                                           | 47656                                                                                                                           |
| Independent reflections                             | 41960                                                                                                                           | 39142                                                                                                                           |
| <i>R</i> (int)                                      | 0.0256                                                                                                                          | 0.1189                                                                                                                          |
| Completeness / %                                    | 99.8                                                                                                                            | 99.4                                                                                                                            |
| Data / restraints / parameters                      | 41960 / 1262 / 2064                                                                                                             | 39142 / 2575 / 1946                                                                                                             |
| Goodness-of-fit on <i>F</i> <sup>2</sup>            | 1.013                                                                                                                           | 1.117                                                                                                                           |
| Final <i>R</i> indices [ <i>I</i> > 2σ( <i>I</i> )] | <i>R</i> 1 = 0.0773,<br><i>wR</i> 2 = 0.2057                                                                                    | <i>R</i> 1 = 0.1631,<br><i>wR</i> 2 = 0.3473                                                                                    |
| <i>R</i> indices (all data)                         | <i>R</i> 1 = 0.1249,<br><i>wR</i> 2 = 0.2508                                                                                    | <i>R</i> 1 = 0.3697,<br><i>wR</i> 2 = 0.5171                                                                                    |
| Absolute structure parameter                        | 0.31(3)                                                                                                                         | 0.25(8)                                                                                                                         |
| Largest diff. peak and hole / e.<br>Å <sup>-3</sup> | 0.851 and -0.720                                                                                                                | 1.493 and -1.175                                                                                                                |

## S7 PXRD of $1X_2$

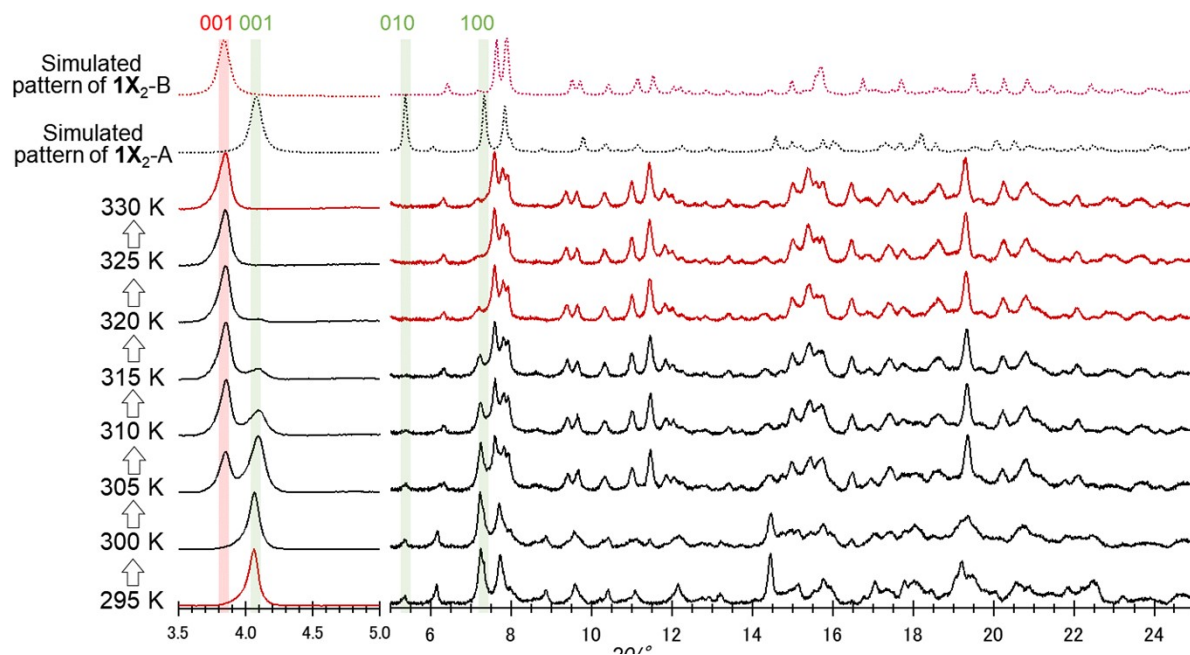

**Figure S11** The change of PXRD patterns when  $1X_2$ -A is heated from 295 to 330 K. The calculated patterns of  $1X_2$ -A and  $1X_2$ -B from data of the single crystal structural analysis are also shown.

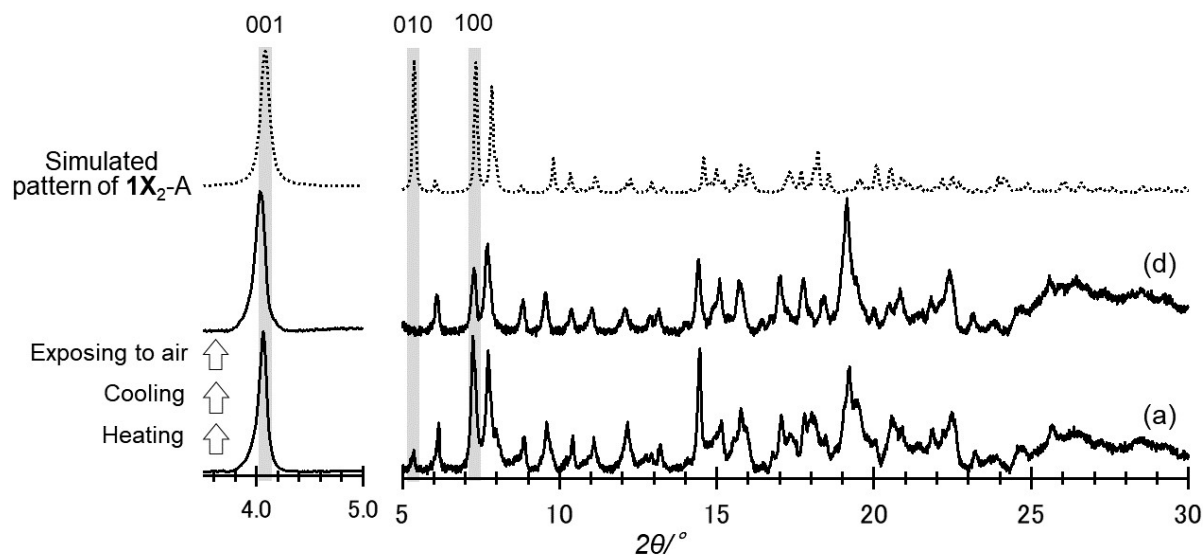

**Figure S12** The change of PXRD patterns when  $1X_2$ -A is heated, cooled, and exposed to air. The patterns of (a)  $1X_2$ -A and (d)  $1X_2$ -C are identical to (a) and (d) in Figure 5. The calculated patterns of  $1X_2$ -A from single crystal data are also shown. The comparison of the patterns suggests that the structures of  $1X_2$ -A and  $1X_2$ -C are similar and  $1X_2$ -C would have a layered structure and 1D chain LS state as  $1X_2$ -A.

## S8 Single crystal X-ray structural analysis of $1\mathbf{T}_2$

The detail of single crystal X-ray structural analysis was described in Supplementary Section S6.

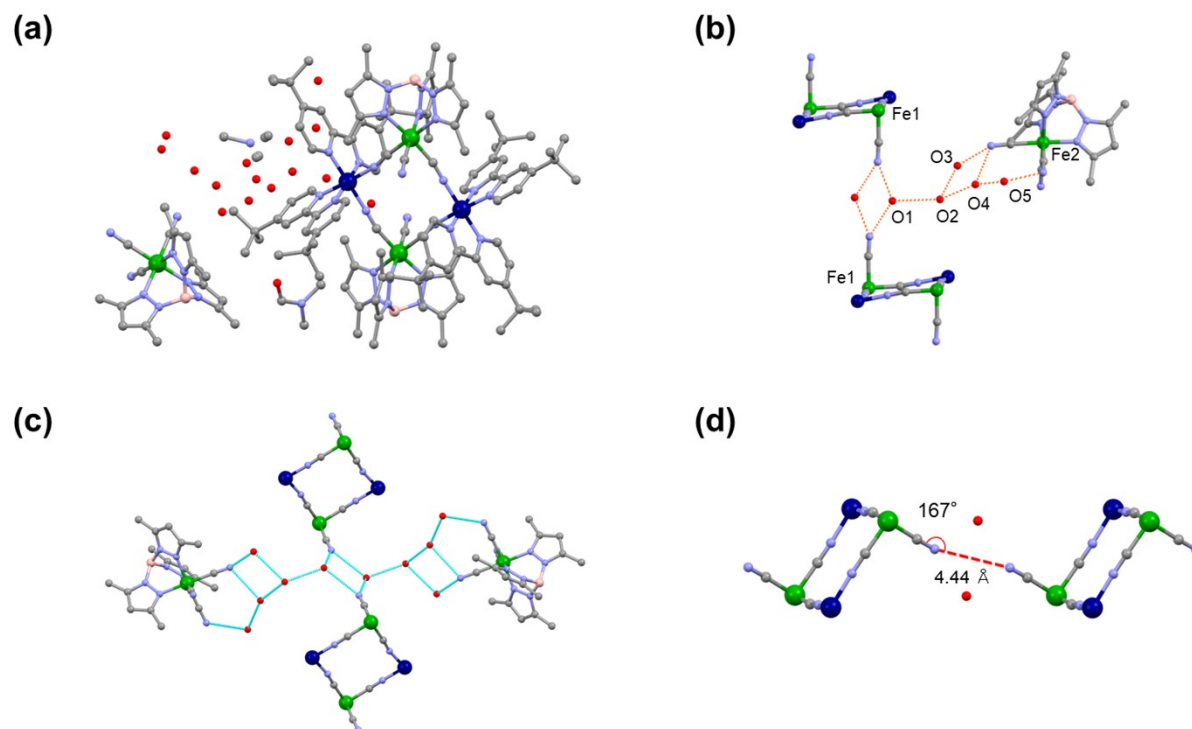

**Figure S13** (a) Single crystal X-ray structure of  $1\mathbf{T}_2 \cdot 18\text{H}_2\text{O} \cdot 4\text{DMF}$  at 120 K. Hydrogen atoms are omitted for clarity. (b) The hydrogen-bonds of neighbouring  $1\mathbf{T}_2$  molecules,  $\mathbf{T}^-$ , and water molecules in the crystal structure of  $1\mathbf{T}_2 \cdot 18\text{H}_2\text{O} \cdot 4\text{DMF}$ . (c) The 1D chain hydrogen-bonding network of  $1\mathbf{T}_2$  with water molecules. (d) The distance between terminal CN groups of neighbouring  $1\mathbf{T}_2$  molecules in the crystal structure of  $1\mathbf{T}_2 \cdot 18\text{H}_2\text{O} \cdot 4\text{DMF}$ .

**Table S6** The distances (Å) of the coordination bonds of  $1T_2 \cdot 18H_2O \cdot 4DMF$  obtained by X-ray structural analysis.

|                     |          |                     |          |
|---------------------|----------|---------------------|----------|
|                     | 2.052(2) |                     | 1.932(2) |
| Fe(1)-N(tp*)        | 2.042(2) | Co(1)-N(dtbbpy)     | 1.933(2) |
|                     | 2.049(2) |                     | 1.926(2) |
|                     |          |                     | 1.924(2) |
|                     | 1.883(3) |                     | 1.898(2) |
| Fe(1)-C(CN)         | 1.894(3) | Co(1)-(NC)          | 1.904(2) |
|                     | 1.895(3) |                     |          |
| <b>Fe(1)-N(ave)</b> | 2.048(2) | <b>Co(1)-N(ave)</b> | 1.919(2) |
| <b>Fe(1)-C(ave)</b> | 1.891(3) |                     |          |

**Table S7** The distances (Å) of the hydrogen-bonds of  $1T_2 \cdot 18H_2O \cdot 4DMF$  obtained by X-ray structural analysis.

|            |      |            |      |
|------------|------|------------|------|
| O(1)-N(NC) | 3.01 | O(1)-O(2)  | 2.82 |
|            | 2.80 | O(2)-O(3)  | 2.93 |
| O(2)-O(4)  | 2.84 | O(3)-N(NC) | 2.93 |
| O(4)-N(NC) | 3.05 | O(4)-O(5)  | 2.90 |
| O(5)-N(NC) | 2.98 |            |      |



**Table S8** Crystallographic parameters and measurement conditions of  $1\mathbf{T}_2 \cdot 18\mathbf{H}_2\mathbf{O} \cdot 4\mathbf{DMF}$ .

|                                                  | $1\mathbf{T}_2$                                                                          |
|--------------------------------------------------|------------------------------------------------------------------------------------------|
| Empirical formula                                | $\text{C}_{156}\text{H}_{248}\text{B}_4\text{Co}_2\text{Fe}_4\text{N}_{48}\text{O}_{22}$ |
| Formula weight                                   | 3532.51                                                                                  |
| Temperature / K                                  | 120                                                                                      |
| Wavelength / Å                                   | 0.71073                                                                                  |
| Crystal system                                   | Triclinic                                                                                |
| Space group                                      | $P\bar{1}$                                                                               |
| $a$ / Å                                          | 12.484(3)                                                                                |
| $b$ / Å                                          | 16.445(4)                                                                                |
| $c$ / Å                                          | 22.402(5)                                                                                |
| $\alpha$ / °                                     | 95.341(4)                                                                                |
| $\beta$ / °                                      | 92.874(3)                                                                                |
| $\gamma$ / °                                     | 94.153(4)                                                                                |
| $V$ / Å <sup>3</sup>                             | 4559.6(17)                                                                               |
| $Z$                                              | 1                                                                                        |
| Density (calculated) / Mg m <sup>-3</sup>        | 1.286                                                                                    |
| Absorption coefficient / mm <sup>-1</sup>        | 0.562                                                                                    |
| $F(000)$                                         | 1874                                                                                     |
| Theta range for data collection                  | 1.473 to 27.499                                                                          |
| Reflections collected                            | 27629                                                                                    |
| Independent reflections                          | 20042                                                                                    |
| $R(\text{int})$                                  | 0.0328                                                                                   |
| Completeness / %                                 | 97.7                                                                                     |
| Data / restraints / parameters                   | 20042 / 183 / 1267                                                                       |
| Goodness-of-fit on $F^2$                         | 1.008                                                                                    |
| Final $R$ indices [ $I > 2\sigma(I)$ ]           | $R1 = 0.0537, wR2 = 0.1189$                                                              |
| $R$ indices (all data)                           | $R1 = 0.0874, wR2 = 0.1361$                                                              |
| Largest diff. peak and hole / e. Å <sup>-3</sup> | 0.978 and -0.826                                                                         |

## S9 Magnetic susceptibility of $1T_2$

The first and the second heating/cooling cycles of magnetic susceptibility measurement of  $1T_2$  are shown in Figure S14(a) and (b), respectively. The  $\chi_M T$  value was 1.07 emu mol<sup>-1</sup> K at 5 K, which is close to the expected value for the LS state of  $1^{2+}$  and two *ls*-Fe<sup>III</sup> ions ( $S = 1/2$ ,  $g = 2.7$ ) of two  $T^-$  anions (expected value:  $\chi_M T = 1.37$  emu mol<sup>-1</sup> K). The  $\chi_M T$  value increases rapidly when the temperature increases from 296 K to 310 K. This rapid increase in  $\chi_M T$  value is attributed to the thermally induced ETCST of  $1^{2+}$  from the LS to the HS state. The  $\chi_M T$  value is 6.27 emu mol<sup>-1</sup> K at 400 K. This value is smaller than the expected value ( $\chi_M T = 7.69$  emu mol<sup>-1</sup> K) for the HS state of  $1^{2+}$  (expected value:  $\chi_M T = 6.33$  emu mol<sup>-1</sup> K) consisting of two *ls*-Fe<sup>III</sup> ions ( $S = 1/2$ ,  $g = 2.7$ ) and two *hs*-Co<sup>II</sup> ions ( $S = 3/2$ ,  $g = 2.3$ ) without magnetic interaction<sup>[2]</sup>, and two *ls*-Fe<sup>III</sup> ions ( $S = 1/2$ ,  $g = 2.7$ ) in two molecules of  $T^-$  (expected value:  $\chi_M T = 1.37$  emu mol<sup>-1</sup> K), suggesting that most of  $1^{2+}$  changed to the LS state.

During the cooling process from 270 K to 150 K, the  $\chi_M T$  value shows a gradual decrease to reach to 3.55 emu mol<sup>-1</sup> K at 100 K, suggesting that about 40% of  $1^{2+}$  changed to the LS state. When the cycle of heating and cooling in the range of 5–400 K is repeated again, the plot shows a gradual transition in the range of 150–270 K (Figure S14(b)). The  $\chi_M T$  value is 6.74 emu mol<sup>-1</sup> K at 400 K, suggesting that most of  $1^{2+}$  is in the HS state.

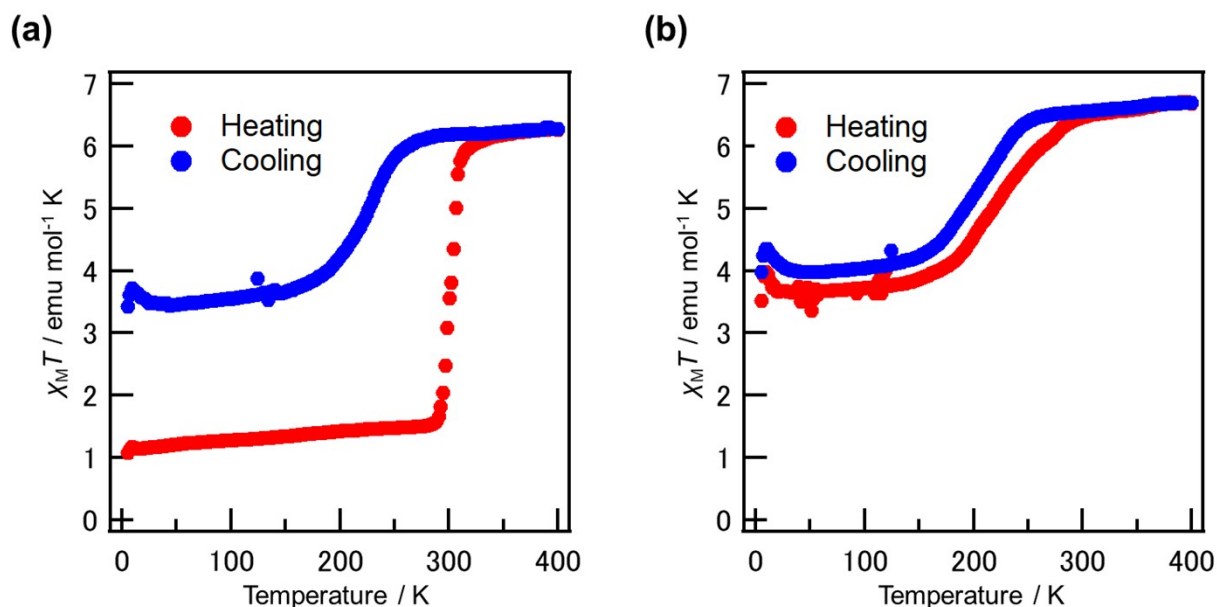

**Figure S14**  $\chi_M T$ - $T$  plot of  $1T_2 \cdot 18H_2O \cdot 4DMF$  of (a) The first cycle and (b) The second cycle.

## S10 IR spectra of $1T_2$ and $1X_2$ during heating and exposing to air

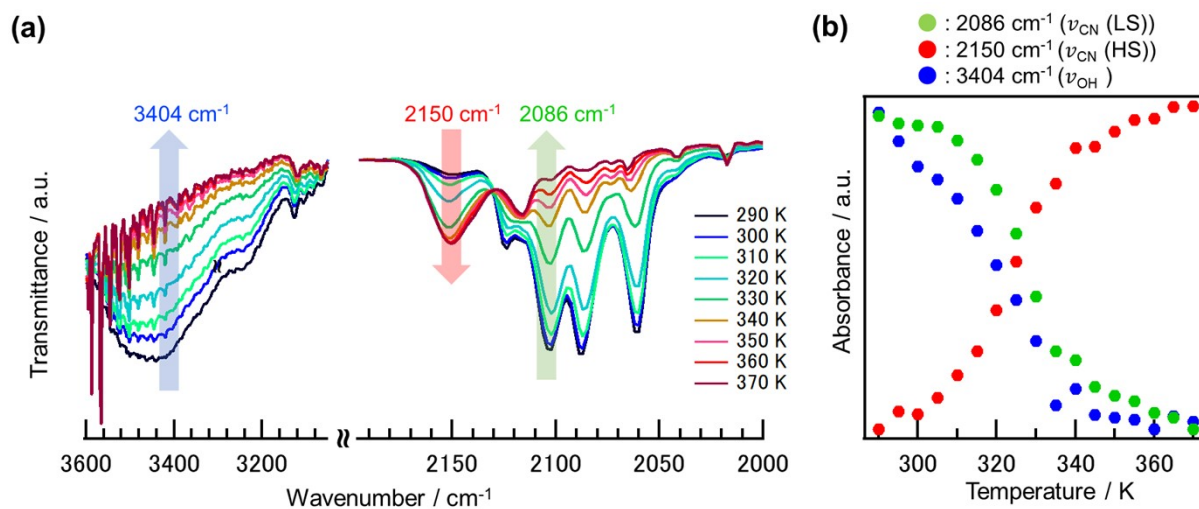

**Figure S15** (a) IR spectra measured by KBr method when  $1T_2 \cdot 18H_2O \cdot 4DMF$  was heated from 290 to 370 K. (b) The temperature dependence of absorbances at  $2086\text{ cm}^{-1}$  ( $\nu_{CN}$  (LS), blue circles),  $2150\text{ cm}^{-1}$  ( $\nu_{CN}$  (HS), red circles), and  $3404\text{ cm}^{-1}$  ( $\nu_{OH}$ , green circles).

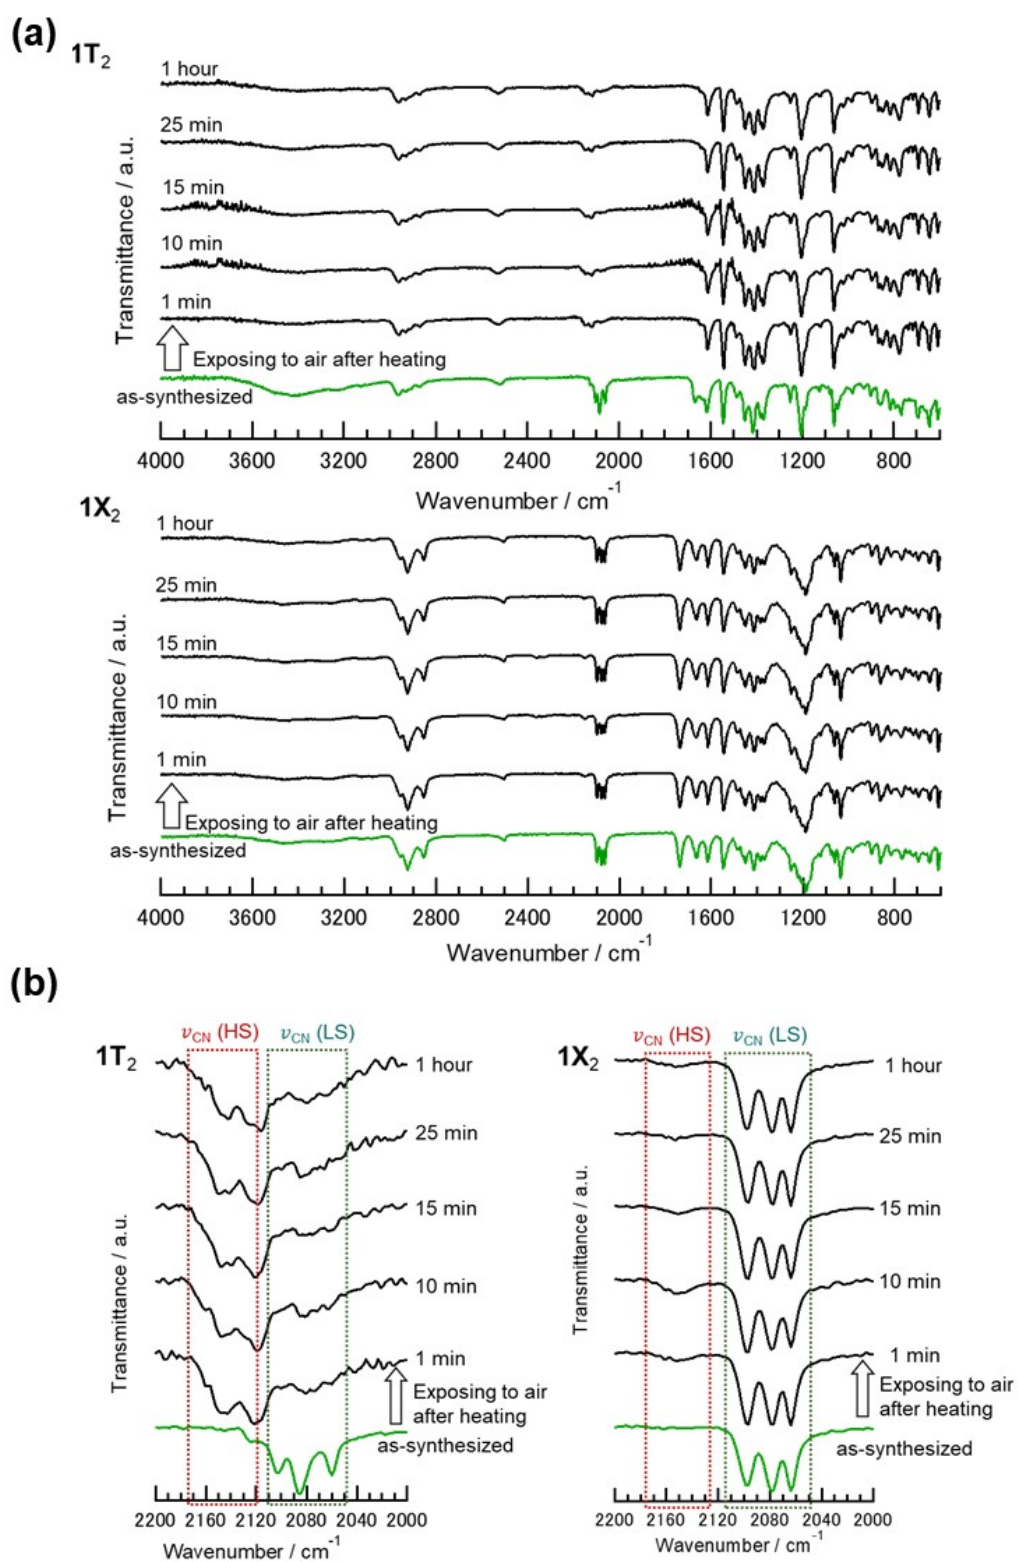

**Figure S16** IR spectra of  $1T_2$  and  $1X_2$  when they were heated and then exposed to air for 1 hr. (a) 600–4000  $\text{cm}^{-1}$  and (b) 2000–2200  $\text{cm}^{-1}$ .

## S11 TG-DTA of $1T_2$

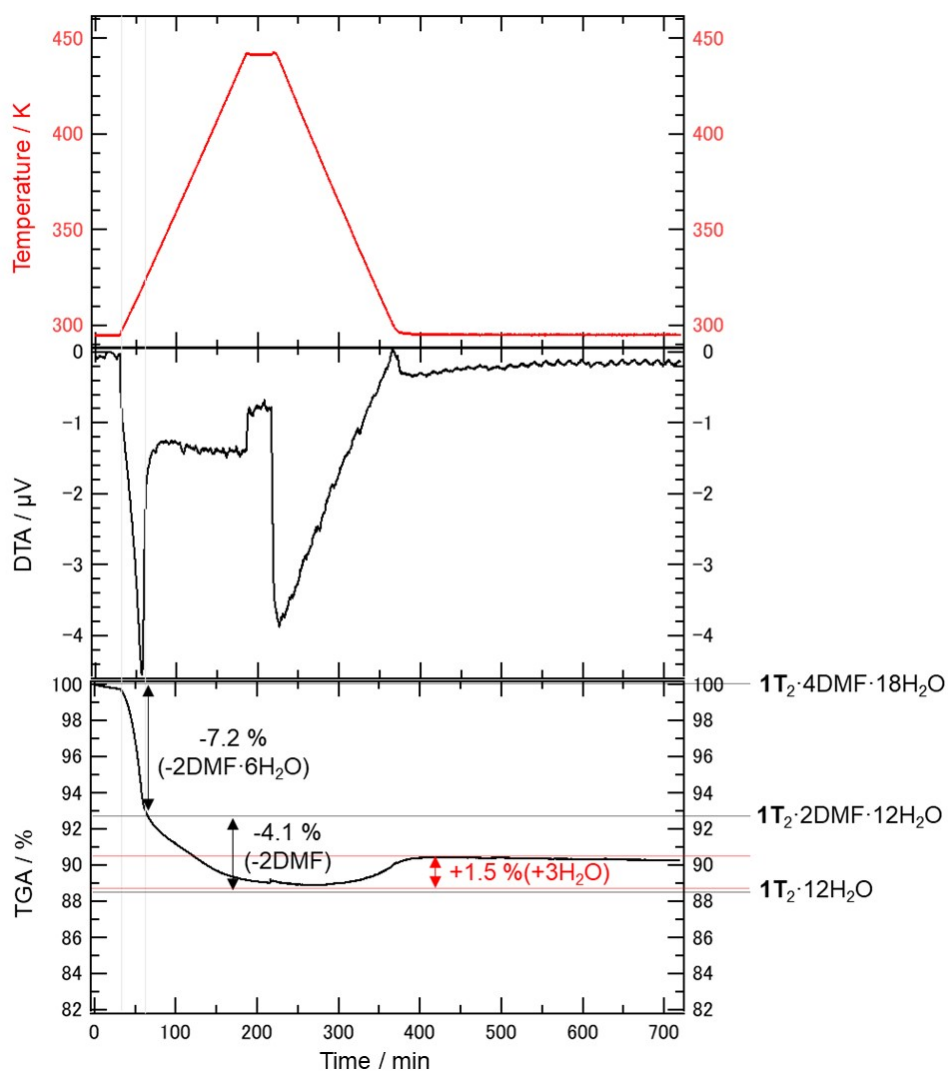

Figure S17 TG-DTA of  $1T_2$ .

## S12 References

- [1] M. Nihei, Y. Sekine, N. Suganami, K. Nakazawa, A. Nakao, H. Nakao, Y. Murakami, H. Oshio, *J. Am. Chem. Soc.* **2011**, *133*, 3592-3600.
- [2] a) D. Li, R. Clérac, O. Roubeau, E. Harté, C. Mathonière, R. L. Bris, S. M. Holmes, *J. Am. Chem. Soc.* **2008**, *130*, 252-258; b) M. Nihei, Y. Sekine, N. Suganami, H. Oshio, *Chem. Lett.* **2010**, *39*, 978-979.

### S13 Explanation of an alert in CIFCHECK

**Datablock: 1X2-B**

**PLAT084\_ALERT\_3\_A High wR2 Value (i.e. > 0.25) ..... 0.52 Report**

The crystal of **1X<sub>2</sub>-B** was obtained by drying a single crystal of **1X<sub>2</sub>-A** mounted on a goniometer of an X-ray diffractometer with N<sub>2</sub> gas flow. The temperature of the N<sub>2</sub> gas has been kept at 260 K for a day and then was increased gradually to 310 K. The crystallinity of the crystal decreased during the transformation, resulting in high wR2 value. In addition, the disorder of **X<sup>-</sup>** having two C12 alkyl chains also can cause high wR2 value.
